1                   **Lnc-*ECAL-1* controls cerebrovascular homeostasis by targeting**  
2                   **endothelium-specific tight junction protein *Cldn5b***

3                   Fang-Fang Li, Yu-Lai Liang, Jing-Jing Zhang, Qing Jing

4  
5 From Key Laboratory of Stem Cell Biology, Shanghai Jiao Tong University School of Medicine  
6 (SJTUSM) & Shanghai Institutes for Biological Sciences (SIBS), Chinese Academy of Sciences  
7 (CAS) (F.-F.L.); CAS Key Laboratory of Tissue Microenvironment and Tumor, Shanghai  
8 Institutes for Biological Sciences, University of Chinese Academy of Sciences, Chinese  
9 Academy of Sciences (CAS) (Y.-L.L., Q.J.); Department of Cardiology, Changhai Hospital (Q.J.);  
10 and Affiliated Hospital of Guangdong Medical University (J.-J.Z.).

11  
12 **Short title:** Lnc-*ECAL-1* controls cerebrovascular homeostasis

13  
14 **Correspondence to:** Qing Jing, Lab of Nucleic Acid & Molecular Medicine, Shanghai Institutes  
15 of Nutrition and Health, Chinese Academy of Sciences, Room 2208, New Building of Biological  
16 Sciences, 320 Yue-Yang Road, Shanghai 200031, China

17 TEL: 86-21-54920610

18 FAX: 86-21-54920612

19 E-mail: [qjing@sibs.ac.cn](mailto:qjing@sibs.ac.cn)

20 **The category:** Original article

21 **Word count:** 5589

22 **Summary statement**

23 Long noncoding RNA *ECAL-1* maintains cerebrovascular pattern formation and integrity  
24 through regulating the expression of endothelium-specific tight junction protein *Cldn5b*.

25 **Abstract**

26 Cerebrovascular disorder-induced brain blood flow interruption or intracranial hemorrhage pose  
27 a great threaten to health. Emerging roles of long-noncoding RNAs (lncRNAs) in diagnosis and  
28 treatment of cardiovascular diseases have been recognized. However, whether and how lncRNAs  
29 modulate vascular homeostasis, especially network formation remain largely unknown.  
30 Here, we identified *ECAL-1*, a long non-coding RNA, as an important determinant for  
31 cerebrovascular homeostasis. Using the morpholino- and CRISPR /Cas9-based genetic  
32 modifications in combination with *in vivo* confocal imaging in zebrafish, we claimed that  
33 inactivation of *ECAL-1* induced the apparent distortion of cerebral vascular pattern accompanied  
34 by intracranial hemorrhage. These cerebrovascular abnormalities were associated with decreased  
35 proliferation and anomalous interconnection of endothelial cells. Importantly, overexpression of  
36 *Cldn5b*, an endothelial cell-specific tight junction protein-encoding gene, could partially rescued  
37 the phenotype induced by *ECAL-1* deficiency. Furthermore, bioinformatic analysis and  
38 experimental validation revealed that *ECAL-1* sponged miR-23a, which targeted *Cldn5b* 3'UTR  
39 and modulated *Cldn5b* expression, to maintain cerebrovascular pattern formation and integrity.  
40 Our results presented here revealed that *ECAL-1* specifically controls cerebrovascular network  
41 formation and integrity through targeting miR-23a-*Cldn5b* axis. These findings provide a new  
42 regulation modality for cerebrovascular patterning and the potential neurovascular disorders, and  
43 *ECAL-1*-miR-23a axis represents as an attractive therapeutic target for cerebrovascular diseases.

44

45 **Key Words**

46 LncRNA; cerebrovascular homeostasis; *Cldn5b*; development

## 47 **Introduction**

48 The homeostasis of brain vascular network is essential for the maintenance of neuronal activities  
49 and the relevant physiological functions, and its disorders result in severe pathologies, such as  
50 multiple sclerosis, hemorrhagic stroke, epilepsy etc. (Obermeier et al., 2013). Indeed, vascular  
51 development undergoes two sequential stages, i.e., vasculogenesis and angiogenesis. Following  
52 the formation of vascular network, blood vessels proceed to reshape through selectively fusing  
53 and degenerating, and then recruiting peripheral cells, i.e., pericytes, astrocytes, and microglia, to  
54 form mature blood vessels (Carmeliet and Jain, 2011; Geudens and Gerhardt, 2011). In the brain,  
55 endothelial cells (ECs) are specialized and particularly important in these processes (Dejana et al.,  
56 2009; Obermeier et al., 2013), despite both ECs connection and pericytes are involved in the  
57 maintenance of vascular integrity (Armulik et al., 2010; Nitta et al., 2003; Wang et al., 2014;  
58 Weis and Cheresh, 2005; Xu et al., 2017).

59 Non-coding RNAs emerge as important regulators and effectors in cardiovascular  
60 development and diseases (Fish et al., 2008; Wang et al., 2008; Xu et al., 2017; Zhou et al., 2014;  
61 Zou et al., 2011). Long non-coding RNAs (lncRNAs) are non-protein coding transcripts longer  
62 than 200 nucleotides, and express in a tissue-specific manner (Orom et al., 2010; Rinn and  
63 Chang, 2012). They can act as signaling, decoying, guiding or scaffolding molecules to mediate  
64 pathophysiological functions (Rinn and Chang, 2012). For instance, *Tie-1 AS* is essential for EC  
65 contact junctions by selectively binding to *Tie-1* mRNA (Li et al., 2010). *Braveheart* functions  
66 upstream of mesoderm posterior 1 (MesP1) and contributes to cardiovascular lineage  
67 commitment (Klattenhoff et al., 2013). *STEEL* modulates angiogenic behavior by forming a  
68 complex with poly(ADP-ribose) polymerase 1 (PARP1) (Man et al., 2018). *LincRNA-p21*  
69 represents a key regulator of cell proliferation and apoptosis during atherosclerosis (Wu et al.,  
70 2014), and sponges miR-130b to promote EC apoptosis and cell cycle progression (He et al.,  
71 2015). However, the roles of lncRNAs in organ-specific endothelial function and vascular  
72 homeostasis remain unclear.

73 Hundreds of lncRNAs have been identified in zebrafish (Kaushik et al., 2013; Pauli et al.,

74 2012; Ulitsky et al., 2011). Given the great convenience of brain vascular network visualization  
75 and genetic manipulation (Chen et al., 2012; Fujita et al., 2011; Vanhollebeke et al., 2015; Xu et  
76 al., 2017), herein we adopted zebrafish to elucidate the roles of lncRNAs in cerebrovascular  
77 homeostasis and the underlying molecular mechanisms. Here, we identified a lncRNA as  
78 endothelial connection associated lncRNA (*ECAL-1*) in zebrafish, and claimed that *ECAL-1* was  
79 indispensable for brain EC connection, and determined EC proliferation *in vivo* and central  
80 arteries (CtAs) morphogenesis.

81

## 82 **Results**

### 83 ***ECAL-1* is required for cerebrovascular homeostasis in zebrafish**

84 To explore the *in vivo* function of *ECAL-1*, we adopted morpholino- and CRISPR/Cas9-mediated  
85 gene modifications in zebrafish. The morpholino knockdown was carried out in wild type  
86 zebrafish embryos. *ECAL-1* MO was designed to target the splicing site of *ECAL-1*, and  
87 micropeptide (MP) MO inhibited the translation of micropeptide (87 amino acids) in *ECAL-1*  
88 (Fig.1A). We found that *ECAL-1* MO reduced the expression of *ECAL-1* (Fig. S1D), and MP MO  
89 downregulated the expression of GFP bearing a binding site of MP MO (Fig. S1A and S1B). In  
90 addition, the expression of *p53* were not changed in embryos injected with *ECAL-1* morpholino  
91 (1 pmol) (Fig.S1C), precluding the morpholino-mediated off-target effects that may lead to  
92 excessive activation of *p53* (Robu et al., 2007; Rossi et al., 2015). With this approach, we  
93 observed that morphology of embryos injected with *ECAL-1* MO and MP MO appeared normal,  
94 while ~20% of *ECAL-1* morphants displayed intracranial hemorrhage at 72 hours post  
95 fertilization (hpf) (Fig.1C and 1D).

96 Based on the CRISPR/Cas9 system, we generated two knockout lines, i.e., MP mutant  
97 without micropeptide translation, and *ECAL-1* mutant without *ECAL-1* expression (Fig.1B and  
98 S1E). The expression of *ECAL-1* was reduced to 40% in MP mutants, and we detected barely no  
99 expression of *ECAL-1* in *ECAL-1* mutant (Fig.S1E). Approximately 5% of embryos exhibited  
100 intracranial hemorrhage, which was no significantly difference among siblings, MP mutants and

101 ECAL-1 mutants (Fig.1C and 1E).

102 Then, to validate the functional phenotype by *ECAL-1* knockdown, we adopted the full  
103 length of *ECAL-1* and the coding sequence of micropeptide. Replenishment of *ECAL-1* capped  
104 mRNA, rather than the coding sequence of micropeptide, decreased the hemorrhage rate in  
105 *ECAL-1* morphants (Fig.1F and 1G), supporting the role of *ECAL-1* in cerebrovascular  
106 homeostasis. Experiments with Quantum Dot injection further demonstrated the disruption of  
107 cerebral vessels in *ECAL-1* morphants (Fig.1H), highlighting the importance of *ECAL-1* in the  
108 development of cerebrovascular network.

109 Collectively, *ECAL-1* is responsible for cerebrovascular integrity to maintain homeostasis  
110 during development.

### 111 ***ECAL-1* determines pattern formation of cerebrovascular network**

112 To further define the vascular abnormalities associated with cerebrovascular homeostasis, we  
113 traced the dynamic changes of cerebrovascular network using the transgenic zebrafish  
114 *Tg(Kdrl:eGFP)*. The central arteries (CtAs) sprout from PHBC from 32 hpf to 48 hpf (Fujita et  
115 al., 2011; Vanhollebeke et al., 2015). Notably, we observed that hemorrhage occurred from 36  
116 hpf (Data not shown), and most hemorrhage events occurred from 48 hpf to 60 hpf and appeared  
117 more severe from 60 hpf to 72 hpf (Fig.2A). The occurrence of intracranial hemorrhage was  
118 coincident with the time window of cerebrovascular network formation, further underscoring the  
119 indispensability for *ECAL-1* in cerebrovascular development.

120 In *ECAL-1* morphants and mutants, both the number of CtAs (Fig.S2A, S2B, S2D and S2E)  
121 and the penetration depth of CtAs into the hindbrain matter (Fig.S2A, S2C, S2D and S2F) were  
122 not affected. However, the pattern of CtAs displayed pruning structures (“H” and “O” type) and  
123 anomalous connection in *ECAL-1* morphants and *ECAL-1* mutants (Fig.2B-2E), but not in MP  
124 mutants (Fig. 2D and 2E). The morphology of primary vessels in brain (PHBC, MCEV, LDA and  
125 CCV) (Fig.S3A-S3D) and trunk (ISV and DLAV) (Fig.S3E and S3F) remained intact in *ECAL-1*  
126 morphants. Together, *ECAL-1* modulates the pattern formation of CtAs.

### 127 ***ECAL-1* is expressed in endothelial cells and neuron of brain**

128 To dissect the action modality of *ECAL-1* in regulating cerebrovascular development, we  
129 characterized its expression pattern. Using whole mount *in situ* hybridization, we identified that  
130 *ECAL-1* was distributed in blood vessels and parenchyma of brain (Fig.3A c and d). Frozen  
131 sections highlighted the expression of *ECAL-1* in vessel wall and the inner part of brain (Fig.3A  
132 h and i). *ECAL-1* expression remained at a high level until 120 hpf (Fig.3B). FACS assay  
133 confirmed the expression of *ECAL-1* in endothelial cells, while highly in non-endothelial cells  
134 (Fig.3C). Fluorescence *in situ* hybridization (FISH) results showed that *ECAL-1* was expressed  
135 in some of *flkl*-positive endothelial cells in trunk at 28 hpf, more was expressed in dorsal  
136 nervous system (Fig.3D). At 48 hpf, *ECAL-1* was mainly co-localized with neuron marker *HuC*  
137 in head (Fig.3E).

### 138 ***ECAL-1* defect disrupts the connection between endothelial cells**

139 We further asked whether *ECAL-1* modulated the biology of endothelial cells. During this  
140 process, migration and proliferation are the main behaviors of vascular endothelial cells.  
141 Through measuring the depth of CtAs penetrated into brain matter, we found that *ECAL-1*  
142 deficiency didn't affect the migration of ECs (Fig.S2A and S2C). However, the ECs numbers in  
143 CtAs was decreased in the *Tg(Flil:negfp,Kdrl:mcherry)* embryos with *ECAL-1* deficiency  
144 (Fig.4A and 4B), and those in PHBC was comparable with sibling controls (Fig.4A and 4C). To  
145 define the potential role of pericytes in cerebrovascular abnormalities by *ECAL-1* deficiency, we  
146 detected the expression of *Pdgfrb*, a pericyte marker. As shown in Fig.4D and 4E, the pericyte  
147 coverage of hindbrain CtAs remained unaffected in *ECAL-1* morphants, precluding the  
148 contribution of pericytes. Ultra-structure analysis of ECs showed that intercellular junctions were  
149 discontinuous. Particularly, intercellular cleft was widened in *ECAL-1* morphants with  
150 intracranial hemorrhage (Fig.4F). These results indicated that *ECAL-1* is essential for EC  
151 proliferation and intercellular connection in CtAs.

### 152 ***ECAL-1* controls the expression of endothelial tight junction protein *Cldn5b* to affect 153 cerebrovascular homeostasis**

154 The maintenance of EC connection is predominated by intercellular junctional complexes

155 comprised of tight junction molecules, e.g., adhesion protein Cdh5 and Cldn5 (Dejana et al.,  
156 2009; Obermeier et al., 2013). We checked the expression of these tight junction-related  
157 molecules, with the results that Cldn5b was reduced, while Cdh5 appeared normal in *ECAL-1*  
158 morphants at 30 hpf (Fig.5A). Western blotting examination demonstrated that Cldn5 protein  
159 was significantly decreased in *ECAL-1* morphants, and Cdh5 protein was comparable with that in  
160 sibling controls at 48 hpf (Fig.5B and 5C). Moreover, immunofluorescent imaging revealed the  
161 expression of *Cldn5* in brain vessels, and validated the reduction of Cldn5 proteins by *ECAL-1*  
162 deficiency (Fig.5D).

163 CLDN5 plays a vital role in blood brain barrier integrity (Nitta et al., 2003; Wang et al.,  
164 2012), and its role in cerebrovascular homeostasis deserves further study. In zebrafish, *Cldn5* has  
165 two orthologous genes, *Cldn5a* and *Cldn5b* (Xie et al., 2010). To explore the role of Cldn5 in  
166 cerebrovascular homeostasis, we designed MOs targeting the ATG start site of *Cldn5a* or *Cldn5b*,  
167 respectively (Fig.S4A). As shown in Fig.S4B-S4E, the level of Cldn5 protein was reduced in  
168 *Cldn5a* morphants and *Cldn5b* morphants. About 40% of *Cldn5b* morphants displayed  
169 hemorrhage at 72 hpf, while *Cldn5a* morphants exhibited no difference with control embryos  
170 (Fig.5E and 5F). Interestingly, *Cldn5b* morphants exhibited more pruning structures than control  
171 embryos (Fig.5G).

172 We further observed the status of vasculature in *Cldn5b* morphants. Quantum Dots injection  
173 experiment revealed that hemorrhage was obvious in embryos with a lower dosage of *Cldn5b*  
174 MO (0.5 pmol), and there was an absence of blood circulation in embryos with a higher dosage  
175 of *Cldn5b* MO (1.0 pmol) (Fig.5H). Injection of *Cldn5b* mRNA could partially rescue the  
176 hemorrhagic phenotype in *ECAL-1* morphants, while *Cdh5* mRNA could not (Fig.5I). All these  
177 results suggested that endothelial tight junction protein Cldn5b functioned downstream of  
178 *ECAL-1* to control the cerebrovascular homeostasis, including integrity and pattern formation.

### 179 ***ECAL-1* May Protect Cldn5b by Acting As a Sponge of miR-23a**

180 It is known that the function of lncRNAs correlates with their localization within cells (Chen,  
181 2016; Ulitsky and Bartel, 2013). Using fluorescence *in situ* hybridization and PCR quantification



182 of cytoplasmic and nuclear RNA fractions, we identified that *ECAL-1* was expressed in  
183 cytoplasm (Fig.6A and 6B), implicating its non-transcriptional modulation on *Cldn5b* expression.  
184 Given the canonical action modality of lncRNAs as molecular sponge (Chen, 2016; He et al.,  
185 2015), we further conducted bioinformatic prediction. We found that both *ECAL-1* and *Cldn5b*  
186 contained a binding site for miR-23a (Fig.6C), which was also widely expressed in the brain  
187 (Fig.6E).

188 To determine whether *Cldn5b* was a target of miR-23a *in vivo*, we co-injected *GFP* mRNAs,  
189 which contained wild-type or mutated *Cldn5b* mRNA 3'UTR following GFP coding sequence  
190 (CDS), with the mixture containing *dsRed* mRNAs and control or miR-23a mimics at the 1-cell  
191 stage. This approach induced a significant downregulation of the expression of GFP bearing a  
192 WT 3'UTR, while the expression of GFP bearing a MU 3'UTR was not affected (Fig.6F and 6G),  
193 indicating that miR-23a inhibited the translation of *Cldn5b* by targeting *Cldn5b* 3'UTR. Taken  
194 together, *ECAL-1* may promoted *Cldn5b* expression by acting as a sponge of miR-23a.

195

## 196 **Discussion**

197 In this study, we demonstrated that *ECAL-1* was an essential lncRNA component for  
198 cerebrovascular integrity in zebrafish. *ECAL-1* determined cerebrovascular pattern formation  
199 through modulating CtAs morphology, EC proliferation and connection. Furthermore, we  
200 identified the tight junction protein, *Cldn5b*, as a critical target of *ECAL-1*, which may tether  
201 miR-23a to achieve the modulation in cytoplasm.

202 Increasing evidences suggest that lncRNAs are of great guiding significance for basic  
203 biology (Derrien et al., 2012; Klattenhoff et al., 2013). Our results confirmed the  
204 spatial-temporal expression of *ECAL-1* in ECs and neurons. To the best of our knowledge, our  
205 work for the first time reported the effects of lncRNA on the maintenance of CtAs morphology  
206 and cerebrovascular pattern formation. Loss-of-function experiments revealed the  
207 indispensability of *ECAL-1* in brain angiogenesis, and its deficiency caused irregularity of  
208 cerebrovascular pattern and EC connection. Of note, despite the difference of intracranial



209 hemorrhage rate in morphants, MP mutants and ECAL-1 mutants, it was consistent that defect of  
210 *ECAL-1*, rather than its encoded micropeptide, caused aberrant CtAs and EC connection.  
211 Potential reasons may underlie the hemorrhagic discrepancy, and the most likely possibility is  
212 that genetic compensation resulted in differential phenotype between morphants and Cas9  
213 mutants. Rescue analysis by *ECAL-1* mRNA and micropeptide coding sequence in *ECAL-1*  
214 morphants confirmed that hemorrhage were owing to *ECAL-1* absence, and not relevant to any  
215 off-target effects or its encoded micropeptide. The evidence that MP mutants without translation  
216 of micropeptide exhibited normal cerebral vasculature and no hemorrhage also supported the  
217 conclusion.

218 It is clear that mural cells and junction proteins are pivotal elements for vascular integrity  
219 (Dejana et al., 2009; Obermeier et al., 2013; Spadoni et al., 2017). In the present study, no  
220 defects of pericyte coverage in *ECAL-1* morphants were observed, whereas ultra-structure  
221 analysis revealed the aberrant connection between endothelial cells in *ECAL-1* morphants. These  
222 findings precluded the contribution of pericyte coverage in *ECAL-1*-defect-induced  
223 cerebrovascular disorders.

224 The core roles of tight junction protein Claudin5 (CLDN5) in blood-brain barrier  
225 permeability of mammals have been identified (Nitta et al., 2003) (He et al., 2015). In zebrafish,  
226 *Cldn5a* expanded the expression in brain vessels from 72 hpf (van Leeuwen et al., 2018), while  
227 *Cldn5b* is enriched in brain vasculature at 48 hpf (Xie et al., 2010). *Cldn5a* is involved in brain  
228 ventricular development (Zhang et al., 2010), and the function of *Cldn5b* remains unknown. Our  
229 work with loss-of-function and rescue experiments revealed that *Cldn5b* dominated the  
230 development of cerebrovascular pattern, and controlled vascular integrity. Interestingly, we  
231 noticed that the degree of bleeding was more severe in *Cldn5b* morphants than in *ECAL-1*  
232 morphants. This inconsistency probably results from that *ECAL-1* is not the only upstream  
233 regulator.

234 The functions of lncRNAs are not only related to its subcellular localization (Chen, 2016;  
235 Ulitsky and Bartel, 2013), but also involved in the flank genes. Our data indicated that *ECAL-1*

236 may act as a sponge of miR-23a to regulate the translation of *Cldn5b* in the cytoplasm, and it did  
237 not regulate flanking genes expression *in cis* (Fig. S5). Our results further demonstrated that  
238 miR-23a inhibited the translation of *Cldn5b*, which was different from the previous report that  
239 miR-23a inhibited the EC permeability when its overexpression was conducted in HUVEC and  
240 mouse model (Li et al., 2016). This discrepancy maybe attributed to the differential response in  
241 different species.

242 It also deserves to note that neurovascular communication also regulates cerebrovascular  
243 development, including vascular integrity (Xu et al., 2017). Herein we identified the  
244 neuron-enrichment of *ECAL-1* and miR-23a. Thus, we can't preclude the possibility that  
245 neuronal *ECAL-1*-miR-23a axis indirectly affected cerebrovascular homeostasis.

246 In summary, our findings reported here provide theoretical basis for underlying mechanism  
247 of cerebrovascular homeostasis, and prompt the investigation of lncRNAs in its related diseases.

248

## 249 **Materials and Methods**

### 250 **Zebrafish Care and Lines**

251 The Tubingen (TU), *Tg(Kdrl:eGFP)*, *Tg(Fli1:neGFP)<sup>y7</sup>* and *Tg(Kdrl:HsHRAS-mCherry)<sup>s896</sup>*  
252 zebrafish lines were raised, mated and staged as described previously (Kimmel et al., 1995). Fish  
253 maintenance was in accordance with guidelines of the Institutional Review Board of the Institute  
254 of Health Sciences, Shanghai Institutes of Biological Sciences, Chinese Academy of Sciences  
255 (Shanghai, China). All animal experiments have local approval and all animal experiments were  
256 carried out in accordance with the National Institutes of Health Guide for the Use of Laboratory  
257 Animals and were approved by the Biological Research Ethics Committee of Institute of Health  
258 Sciences.

### 259 **Euthanasia of zebrafish**

260 All animal experiments were performed on zebrafish embryos less than 120 hpf and euthanasia  
261 was performed by rapid freezing followed by maceration.

### 262 **Morpholinos and mRNA Injection**

263 All morpholinos (MOs) were purchased from GeneTools (Philomath, OR) and dissolved in RNA  
264 free water (without treatment of DEPC). MOs against *ECAL-1* were designed to block the  
265 micropeptide translation initiation or modify the splicing site. A scramble MO was used as a  
266 control.

267 Capped mRNA was synthesized with Sp6 (Promega, WI) or T7 RNA polymerase (Roche,  
268 Mannheim). Embryos at one-cell stage were injected with 1 nL MO or/and mRNA, and the  
269 concentrations were as follows unless specified elsewhere: *ECAL-1* MO, 1 mmol/L; MP MO, 1  
270 mmol/L; Control MO, 1 mmol/L; *ECAL-1* mRNA, 200 ng/μL; MP mRNA 200 ng/μL, *dsRed*  
271 mRNA, 100 ng/μL.

### 272 ***In Vitro* Transcription of Cas9 and gRNA**

273 The Cas9 mRNA were synthesized by *in vitro* transcription using T7 RNA polymerase (Roche,  
274 Mannheim). The target sites of gRNA starting with “GG” or “GA” were designed manually, and  
275 the sequence of a T7 or SP6 promoter was added to the 5’-upstream of gRNA sequence. The  
276 Cas9 mRNA and gRNAs were co-injected into 1-cell stage embryos. Each embryo was injected  
277 with 1 nL solution containing 200 ng/μL Cas9 mRNA and 100 ng/μL gRNA.

278 The sequence of gRNAs (including T7 promoter and target site) were listed in Table.

### 279 **Genotype Identification of Mutant Fish Line**

280 Based on the gRNA target site, we design primers to amplify the wild-type or mutated region.  
281 We screened the founders by PCR and sequencing. To further confirmation the genotype of  
282 *ECAL-1* mutant, we further designed a pair of primers that could only obtain bands in the wild  
283 type embryos, not in *ECAL-1* mutants. Primers for genotype identification are shown in  
284 supplementary.

### 285 **O-dianisidine Staining and Scoring of Hemorrhage**

286 TU embryos were collected at 72 hpf, and were stained as previously described (Paffett-Lugassy  
287 and Zon, 2005). Embryos with normal gross morphology were enrolled to account the  
288 hemorrhage rate, which was divided into four categories, including no hemorrhage, a small  
289 hemorrhage site, a large hemorrhage site, and two or more hemorrhage sites.

290 **RNA Extraction and Quantitative Reverse Transcriptase-Polymerase Chain Reaction**  
291 **(RT-PCR)**

292 The total RNA from embryos was extracted using TRIzol reagent (Invitrogen) according to the  
293 protocol. The total RNA extracted was used to generate cDNA by using Super Script II reverse  
294 transcriptase with random primer for mRNA. RT-PCR was performed using SYBR Green  
295 (TOYOBO, Japan). The relative RNA amount was calculated with the  $\Delta\Delta C_t$  method and  
296 normalized with internal control  $\beta$ -actin.

297 **Fluorescent-Activated Cell Sorting (FACS)**

298 To isolate GFP-positive endothelial cells from embryos, about 200 *Tg(Kdrl:eGFP)* embryos at  
299 30 hpf were digested into single cell with 1 mL 0.25% trypsin (Gibico, MD) at 28.5 °C until no  
300 clumps of tissue are visible to the naked eye. The cells were precipitated by centrifugation (400g,  
301 5min) after adding FBS to stop digestion. Then the cell were rinsed with 10% FBS/PBS for three  
302 times. After filtration, the cells resuspended solution (10% FBS/PBS) was sorting by (BD SORP  
303 FACS Aria).

304 **Isolation of Cytoplasmic and Nuclear RNA Fractions**

305 About 200 *Tg(Kdrl:eGFP)* embryos at 48hpf were digested into single cell in accordance with  
306 2.8. Then isolation of cytoplasmic and nuclear RNA fractions was performed as previously  
307 described (Chen et al., 2008). Briefly, cells pellets were resuspended in lysis buffer (10mM Tris  
308 (pH8.0), 140mM NaCl, 1.5mM MgCl<sub>2</sub>, 0.5% Igepal, 2mM vanadyl robonucleoside complex  
309 (VRC, Invitrogen, CA), incubated on ice for 5 min. The lysate was centrifuged at 1000g for 3  
310 min at 4 °C to pellet the nuclei and the supernatant was the cytoplasmic fraction.

311 **Whole-mount *in situ* Hybridization**

312 Whole-mount *in situ* hybridization with Digoxigenin (Roche, Mannheim) labeled probes was  
313 performed in wild type embryos as previously described (Thisse and Thisse, 2008). The  
314 sequence of probes for *Kdrl* and *Cmyb* were described previously (Krueger et al., 2011; North et  
315 al., 2007). The LNA probe for miR-23a was purchased from Exiqon (Vedbaek, Denmark). The  
316 LNA sequence and primers for *in situ* hybridization probes are shown in supplementary.

## 317 **Fluorescence *in situ* Hybridization and Immunofluorescence**

318 Fluorescence *in situ* hybridization with Digoxigenin (Roche, Mannheim) labeled probe was  
319 performed in wild type embryos at the first and second day as previously described (Thisse and  
320 Thisse, 2008). The embryos were blocked with 2% Blocking Reagent (Roche, Mannheim) for 1h,  
321 and then incubated in a solution of anti-Digoxigenin-POD Fab Fragments (Roche, Mannheim,  
322 1:1000). The samples were rocked gently overnight at 4 °C, and washed 6 times for 20 min each  
323 with PBST (0.1% Tween in PBS). A buffer containing Cy3 (PerkinElmer, Waltham, 1:50) was  
324 used to stain the samples for 40 min.

325 For immunofluorescent imaging, the embryos were incubated with a blocking buffer (PBS  
326 with 0.1% tween20, 0.1% TritonX100, 10% goat serum, 1% BSA) for 1h, and then with primary  
327 antibody overnight at 4 °C. After washing six times with PBST, embryos were incubated with a  
328 secondary antibody (goat anti-mouse IgG, Alexa 488/594; Invitrogen, CA, 1:1000), and imaging  
329 ensued.

330 Antibodies used in this study: anti-GFP (Yeasen, China, 1:1000); anti-Claudin5 (Invitrogen,  
331 CA, 1:100).

## 332 **Confocal Imaging and Analysis**

333 Confocal imaging was performed as previously described (Chen et al., 2016; Zou et al., 2011).  
334 The embryos were anesthetized in 0.04% Tricaine (Sigma-Aldrich, MO) medium, then were  
335 mounted in low melting point Agarose (Sigma-Aldrich, MO). We scanned the interested area  
336 with 1.5 µm step size and the format was 1,024x1,024 pixel at 400 Hz. All the confocal images  
337 were lateral views, dorsal was up, and anterior to the left unless specifically noted. Both CtAs  
338 sprouting in hindbrain and abnormal CtAs were scored in the confocal images.

## 339 ***In Vivo* Fluorescence Protein Assay**

340 Modified GFP mRNAs bearing *Cldn5b* 3'UTR (wild-type or mutated) following the GFP open  
341 reading frame were synthesized by *in vitro* transcription, and they were separately co-injected  
342 with miR-23a/control mimic and *dsRed* mRNA into 1-cell stage embryos. The concentrations of  
343 the mRNA and mimics were as follows: GFP mRNA, 50 ng/µL; *dsRed* mRNA, 50 ng/µL;

344 miR-23a/control mimic, 2.5  $\mu$ M. Fluorescence intensity of GFP and dsRed in trunk were  
345 quantified by ImageJ at 30 hpf and dsRed was used as an internal control.

### 346 **Angiography**

347 Angiography was performed as previously described (Schmitt et al., 2012). Briefly, 55 hpf  
348 *Tg(Kdrl:eGFP)* larvae were anesthetized in 0.04% Tricaine (Sigma-Aldrich, MO) medium, and  
349 then 2 nl Quantum Dots were injected into venous sinus through a microinjection setup with  
350 glass capillaries.

### 351 **Bioinformatic Analysis**

352 The online tools of [genie.weizmann.ac.il/pubs/mir07/mir07\\_prediction.html](http://genie.weizmann.ac.il/pubs/mir07/mir07_prediction.html) and TargetScan  
353 were used to identify potential binding sites of miR-23a in *ECAL-1* and *Cldn5b* 3'UTR,  
354 respectively.

### 355 **Statistical Analysis**

356 All the results were generated from at least three independent experiments, and data were  
357 presented as means  $\pm$  SEM. Statistical analysis was performed using GraphPad. Analysis of  
358 differences between two groups was conducted the unpaired Student's two-tailed *t*-test. When  
359 more than two groups, statistical differences were performed one-way ANOVA with Tukey's  
360 *post-hoc* test. Differences were considered significant when  $P < 0.05$ . Probability values are  
361 indicated by \* ( $P < 0.05$ ), \*\* ( $P < 0.01$ ), or \*\*\* ( $P < 0.001$ ).

362

### 363 **Acknowledgements**

364 We thank Dr. Didier Stainier (Max Planck Institute, Bad Nauheim, Germany) for providing  
365 *Tg(Kdrl:HsHRAS-mCherry)<sup>s896</sup>* transgenic lines; and Dr. Nathan Lawson (University of  
366 Massachusetts Medical School, Worcester, USA) for kindly providing the *Tg(Kdrl:eGFP)*. We  
367 thank Dr. Jun Li (Shanghai General Hospital, China) for modifying the manuscript; Dr. Jiu-Lin  
368 Du (Institute of neuroscience, CAS, Shanghai, China) for kindly providing *Tg(Fli1:neGFP)*; and  
369 Dr Jing-Wei Xiong (Peking University, Beijing, China) for providing the plasmids of  
370 CRISPR/Cas9 system. We thank all members in Dr. Jing's lab for helpful discussions and

371 comments on this article. We thank Min Deng for technical assistance and Sheng-Rong Yang for  
372 zebrafish husbandry.

373

### 374 **Competing interests**

375 No competing interests declared.

376

### 377 **Data availability**

378 All relevant data are within the paper and its Supporting Information files

379

### 380 **Sources of Funding**

381 This work was supported in part by the National Key Research and Development Program of  
382 China (2017YFA0103700), the National Natural Science Foundation of China (91339205,  
383 91739301, 81130005).

384

### 385 **References**

386 Armulik, A., Genove, G., Mae, M., Nisancioglu, M.H., Wallgard, E., Niaudet, C., He, L., Norlin, J., Lindblom, P.,  
387 Strittmatter, K., et al. (2010). Pericytes regulate the blood-brain barrier. *Nature* *468*, 557-561.

388 <https://doi.org/10.1038/nature09522>

389 Carmeliet, P., and Jain, R.K. (2011). Molecular mechanisms and clinical applications of angiogenesis. *Nature* *473*,  
390 298-307. <https://doi.org/10.1038/nature10144>

391 Chen, J., Zhu, R.F., Li, F.F., Liang, Y.L., Wang, C., Qin, Y.W., Huang, S., Zhao, X.X., and Jing, Q. (2016). MicroRNA-126a  
392 Directs Lymphangiogenesis Through Interacting With Chemokine and Flt4 Signaling in Zebrafish. *Arteriosclerosis,*  
393 *thrombosis, and vascular biology* *36*, 2381-2393. <https://doi.org/10.1161/ATVBAHA.116.308120>

394 Chen, L.L. (2016). Linking Long Noncoding RNA Localization and Function. *Trends in biochemical sciences* *41*,  
395 761-772. <https://doi.org/10.1016/j.tibs.2016.07.003>

396 Chen, L.L., DeCerbo, J.N., and Carmichael, G.G. (2008). Alu element-mediated gene silencing. *The EMBO journal* *27*,  
397 1694-1705. <https://doi.org/10.1038/emboj.2008.94>

398 Chen, Q., Jiang, L., Li, C., Hu, D., Bu, J.W., Cai, D., and Du, J.L. (2012). Haemodynamics-driven developmental pruning  
399 of brain vasculature in zebrafish. *PLoS Biol* *10*, e1001374. <https://doi.org/10.1371/journal.pbio.1001374>

400 Dejana, E., Tournier-Lasserre, E., and Weinstein, B.M. (2009). The control of vascular integrity by endothelial cell  
401 junctions: molecular basis and pathological implications. *Developmental cell* *16*, 209-221.

402 <https://doi.org/10.1016/j.devcel.2009.01.004>

403 Derrien, T., Johnson, R., Bussotti, G., Tanzer, A., Djebali, S., Tilgner, H., Guernec, G., Martin, D., Merkel, A., Knowles,



404 D.G., et al. (2012). The GENCODE v7 catalog of human long noncoding RNAs: analysis of their gene structure,  
405 evolution, and expression. *Genome research* 22, 1775-1789. <https://doi.org/10.1101/gr.132159.111>  
406 Fish, J.E., Santoro, M.M., Morton, S.U., Yu, S., Yeh, R.F., Wythe, J.D., Ivey, K.N., Bruneau, B.G., Stainier, D.Y., and  
407 Srivastava, D. (2008). miR-126 regulates angiogenic signaling and vascular integrity. *Developmental cell* 15, 272-284.  
408 <https://doi.org/10.1016/j.devcel.2008.07.008>  
409 Fujita, M., Cha, Y.R., Pham, V.N., Sakurai, A., Roman, B.L., Gutkind, J.S., and Weinstein, B.M. (2011). Assembly and  
410 patterning of the vascular network of the vertebrate hindbrain. *Development* 138, 1705-1715.  
411 <https://doi.org/10.1242/dev.058776>  
412 Geudens, I., and Gerhardt, H. (2011). Coordinating cell behaviour during blood vessel formation. *Development* 138,  
413 4569-4583. <https://doi.org/10.1242/dev.062323>  
414 He, C., Ding, J.W., Li, S., Wu, H., Jiang, Y.R., Yang, W., Teng, L., Yang, J., and Yang, J. (2015). The Role of Long  
415 Intergenic Noncoding RNA p21 in Vascular Endothelial Cells. *DNA and cell biology* 34, 677-683.  
416 <https://doi.org/10.1089/dna.2015.2966>  
417 Kaushik, K., Leonard, V.E., Kv, S., Lalwani, M.K., Jalali, S., Patowary, A., Joshi, A., Scaria, V., and Sivasubbu, S. (2013).  
418 Dynamic expression of long non-coding RNAs (lncRNAs) in adult zebrafish. *PloS one* 8, e83616.  
419 <https://doi.org/10.1371/journal.pone.0083616>  
420 Kimmel, C.B., Ballard, W.W., Kimmel, S.R., Ullmann, B., and Schilling, T.F. (1995). Stages of embryonic development  
421 of the zebrafish. *Developmental dynamics : an official publication of the American Association of Anatomists* 203,  
422 253-310. <https://doi.org/10.1002/aja.1002030302>  
423 Klattenhoff, C.A., Scheuermann, J.C., Surface, L.E., Bradley, R.K., Fields, P.A., Steinhauser, M.L., Ding, H., Butty, V.L.,  
424 Torrey, L., Haas, S., et al. (2013). Braveheart, a long noncoding RNA required for cardiovascular lineage commitment.  
425 *Cell* 152, 570-583. <https://doi.org/10.1016/j.cell.2013.01.003>  
426 Krueger, J., Liu, D., Scholz, K., Zimmer, A., Shi, Y., Klein, C., Siekmann, A., Schulte-Merker, S., Cudmore, M., Ahmed,  
427 A., et al. (2011). Flt1 acts as a negative regulator of tip cell formation and branching morphogenesis in the zebrafish  
428 embryo. *Development* 138, 2111-2120. <https://doi.org/10.1242/dev.063933>  
429 Li, J., Zhao, Y., Lu, Y., Ritchie, W., Grau, G., Vadas, M.A., and Gamble, J.R. (2016). The Poly-cistronic miR-23-27-24  
430 Complexes Target Endothelial Cell Junctions: Differential Functional and Molecular Effects of miR-23a and miR-23b.  
431 *Mol Ther Nucleic Acids* 5, e354. <https://doi.org/10.1038/mtna.2016.62>  
432 Li, K., Blum, Y., Verma, A., Liu, Z., Pramanik, K., Leigh, N.R., Chun, C.Z., Samant, G.V., Zhao, B., Garraas, M.K., et al.  
433 (2010). A noncoding antisense RNA in tie-1 locus regulates tie-1 function in vivo. *Blood* 115, 133-139.  
434 <https://doi.org/10.1182/blood-2009-09-242180>  
435 Man, H.S.J., Sukumar, A.N., Lam, G.C., Turgeon, P.J., Yan, M.S., Ku, K.H., Dubinsky, M.K., Ho, J.J.D., Wang, J.J., Das, S.,  
436 et al. (2018). Angiogenic patterning by STEEL, an endothelial-enriched long noncoding RNA. *Proceedings of the*  
437 *National Academy of Sciences of the United States of America* 115, 2401-2406.  
438 <https://doi.org/10.1073/pnas.1715182115>  
439 Nitta, T., Hata, M., Gotoh, S., Seo, Y., Sasaki, H., Hashimoto, N., Furuse, M., and Tsukita, S. (2003). Size-selective  
440 loosening of the blood-brain barrier in claudin-5-deficient mice. *The Journal of cell biology* 161, 653-660.  
441 <https://doi.org/10.1083/jcb.200302070>  
442 North, T.E., Goessling, W., Walkley, C.R., Lengerke, C., Kopani, K.R., Lord, A.M., Weber, G.J., Bowman, T.V., Jang, I.H.,  
443 Grosser, T., et al. (2007). Prostaglandin E2 regulates vertebrate haematopoietic stem cell homeostasis. *Nature* 447,  
444 1007-1011. <https://doi.org/10.1038/nature05883>

445 Obermeier, B., Daneman, R., and Ransohoff, R.M. (2013). Development, maintenance and disruption of the  
446 blood-brain barrier. *Nat Med* 19, 1584-1596. <https://doi.org/10.1038/nm.3407>

447 Orom, U.A., Derrien, T., Beringer, M., Gumireddy, K., Gardini, A., Bussotti, G., Lai, F., Zytynski, M., Notredame, C.,  
448 Huang, Q., et al. (2010). Long noncoding RNAs with enhancer-like function in human cells. *Cell* 143, 46-58.  
449 <https://doi.org/10.1016/j.cell.2010.09.001>

450 Paffett-Lugassy, N.N., and Zon, L.I. (2005). Analysis of hematopoietic development in the zebrafish. *Methods in*  
451 *molecular medicine* 105, 171-198.

452 Pauli, A., Valen, E., Lin, M.F., Garber, M., Vastenhouw, N.L., Levin, J.Z., Fan, L., Sandelin, A., Rinn, J.L., Regev, A., et al.  
453 (2012). Systematic identification of long noncoding RNAs expressed during zebrafish embryogenesis. *Genome*  
454 *research* 22, 577-591. <https://doi.org/10.1101/gr.133009.111>

455 Rinn, J.L., and Chang, H.Y. (2012). Genome regulation by long noncoding RNAs. *Annual review of biochemistry* 81,  
456 145-166. <https://doi.org/10.1146/annurev-biochem-051410-092902>

457 Robu, M.E., Larson, J.D., Nasevicius, A., Beiraghi, S., Brenner, C., Farber, S.A., and Ekker, S.C. (2007). p53 activation  
458 by knockdown technologies. *PLoS genetics* 3, e78. <https://doi.org/10.1371/journal.pgen.0030078>

459 Rossi, A., Kontarakis, Z., Gerri, C., Nolte, H., Holper, S., Kruger, M., and Stainier, D.Y. (2015). Genetic compensation  
460 induced by deleterious mutations but not gene knockdowns. *Nature* 524, 230-233.  
461 <https://doi.org/10.1038/nature14580>

462 Schmitt, C.E., Holland, M.B., and Jin, S.W. (2012). Visualizing vascular networks in zebrafish: an introduction to  
463 microangiography. *Methods in molecular biology* 843, 59-67. [https://doi.org/10.1007/978-1-61779-523-7\\_6](https://doi.org/10.1007/978-1-61779-523-7_6)

464 Spadoni, I., Fornasa, G., and Rescigno, M. (2017). Organ-specific protection mediated by cooperation between  
465 vascular and epithelial barriers. *Nature reviews. Immunology* 17, 761-773. <https://doi.org/10.1038/nri.2017.100>

466 Thisse, C., and Thisse, B. (2008). High-resolution in situ hybridization to whole-mount zebrafish embryos. *Nature*  
467 *protocols* 3, 59-69. <https://doi.org/10.1038/nprot.2007.514>

468 Ulitsky, I., and Bartel, D.P. (2013). lincRNAs: genomics, evolution, and mechanisms. *Cell* 154, 26-46.  
469 <https://doi.org/10.1016/j.cell.2013.06.020>

470 Ulitsky, I., Shkumatava, A., Jan, C.H., Sive, H., and Bartel, D.P. (2011). Conserved function of lincRNAs in vertebrate  
471 embryonic development despite rapid sequence evolution. *Cell* 147, 1537-1550.  
472 <https://doi.org/10.1016/j.cell.2011.11.055>

473 van Leeuwen, L.M., Evans, R.J., Jim, K.K., Verboom, T., Fang, X., Bojarczuk, A., Malicki, J., Johnston, S.A., and van der  
474 Sar, A.M. (2018). A transgenic zebrafish model for the in vivo study of the blood and choroid plexus brain barriers  
475 using claudin 5. *Biol Open* 7. <https://doi.org/10.1242/bio.030494>

476 Vanhollebeke, B., Stone, O.A., Bostaille, N., Cho, C., Zhou, Y., Maquet, E., Gauquier, A., Cabochette, P., Fukuhara, S.,  
477 Mochizuki, N., et al. (2015). Tip cell-specific requirement for an atypical Gpr124- and Reck-dependent  
478 Wnt/beta-catenin pathway during brain angiogenesis. *eLife* 4. <https://doi.org/10.7554/eLife.06489>

479 Wang, S., Aurora, A.B., Johnson, B.A., Qi, X., McAnally, J., Hill, J.A., Richardson, J.A., Bassel-Duby, R., and Olson, E.N.  
480 (2008). The endothelial-specific microRNA miR-126 governs vascular integrity and angiogenesis. *Developmental cell*  
481 *15*, 261-271. <https://doi.org/10.1016/j.devcel.2008.07.002>

482 Wang, Y., Pan, L., Moens, C.B., and Appel, B. (2014). Notch3 establishes brain vascular integrity by regulating  
483 pericyte number. *Development* 141, 307-317. <https://doi.org/10.1242/dev.096107>

484 Wang, Y., Rattner, A., Zhou, Y., Williams, J., Smallwood, P.M., and Nathans, J. (2012). Norrin/Frizzled4 signaling in  
485 retinal vascular development and blood brain barrier plasticity. *Cell* 151, 1332-1344.

486 <https://doi.org/10.1016/j.cell.2012.10.042>  
487 Weis, S.M., and Cheresh, D.A. (2005). Pathophysiological consequences of VEGF-induced vascular permeability.  
488 *Nature* 437, 497-504. <https://doi.org/10.1038/nature03987>  
489 Wu, G., Cai, J., Han, Y., Chen, J., Huang, Z.P., Chen, C., Cai, Y., Huang, H., Yang, Y., Liu, Y., et al. (2014). LincRNA-p21  
490 regulates neointima formation, vascular smooth muscle cell proliferation, apoptosis, and atherosclerosis by  
491 enhancing p53 activity. *Circulation* 130, 1452-1465. <https://doi.org/10.1161/CIRCULATIONAHA.114.011675>  
492 Xie, J., Farage, E., Sugimoto, M., and Anand-Apte, B. (2010). A novel transgenic zebrafish model for blood-brain and  
493 blood-retinal barrier development. *BMC Dev Biol* 10, 76. <https://doi.org/10.1186/1471-213X-10-76>  
494 Xu, B., Zhang, Y., Du, X.F., Li, J., Zi, H.X., Bu, J.W., Yan, Y., Han, H., and Du, J.L. (2017). Neurons secrete  
495 miR-132-containing exosomes to regulate brain vascular integrity. *Cell Res* 27, 882-897.  
496 <https://doi.org/10.1038/cr.2017.62>  
497 Zhang, J., Piontek, J., Wolburg, H., Piehl, C., Liss, M., Otten, C., Christ, A., Willnow, T.E., Blasig, I.E., and  
498 Abdelilah-Seyfried, S. (2010). Establishment of a neuroepithelial barrier by Claudin5a is essential for zebrafish brain  
499 ventricular lumen expansion. *Proceedings of the National Academy of Sciences of the United States of America* 107,  
500 1425-1430. <https://doi.org/10.1073/pnas.0911996107>  
501 Zhou, W., Fong, M.Y., Min, Y., Somlo, G., Liu, L., Palomares, M.R., Yu, Y., Chow, A., O'Connor, S.T., Chin, A.R., et al.  
502 (2014). Cancer-secreted miR-105 destroys vascular endothelial barriers to promote metastasis. *Cancer cell* 25,  
503 501-515. <https://doi.org/10.1016/j.ccr.2014.03.007>  
504 Zou, J., Li, W.Q., Li, Q., Li, X.Q., Zhang, J.T., Liu, G.Q., Chen, J., Qiu, X.X., Tian, F.J., Wang, Z.Z., et al. (2011). Two  
505 functional microRNA-126s repress a novel target gene p21-activated kinase 1 to regulate vascular integrity in  
506 zebrafish. *Circulation research* 108, 201-209. <https://doi.org/10.1161/CIRCRESAHA.110.225045>

507

## 508 **Figure Legends**

### 509 **Figure 1. *ECAL-1* was essential for cerebrovascular homeostasis.**

510 (A) Diagram and sequence of morpholinos (MO) target sites. (B) Schematic diagram of  
511 *ECAL-1* knockout line and the mutated sequences of micropeptide (MP) mutant and *ECAL-1*  
512 mutant. (C) Bright field images of O-dianisidine staining embryos, including morphants and  
513 mutants. Hemorrhage sites are indicated by black arrows. (D and E) Statistics of embryos with  
514 cranial hemorrhage in *ECAL-1* morphants and mutants. (D) N=304, 303 and 320 for control MO,  
515 MP MO and *ECAL-1* MO, respectively. (E) N=387, 501 and 151 for Sibling, MP mutant and  
516 *ECAL-1* mutant, respectively. Statistical analysis was conducted using one-way ANOVA *post*  
517 *hoc* Tukey test. (F) Statistics of cranial hemorrhage in embryos injected with control MO,  
518 *ECAL-1* MO, *ECAL-1* mRNA, micropeptide (MP) mRNA, (*ECAL-1* MO and *ECAL-1* mRNA),  
519 (*ECAL-1* MO and MP mRNA). Statistical analysis was conducted using one-way ANOVA *post*

520 *hoc* Tukey test. **(G)** Percentage of cranial hemorrhage in embryos injected with control MO,  
521 *ECAL-1* MO, *ECAL-1* mRNA, MP mRNA, (*ECAL-1* MO and *ECAL-1* mRNA), (*ECAL-1* MO  
522 and MP mRNA) in different degree. (F and G) N=127, 117, 103, 86, 89 and 99 for control MO,  
523 *ECAL-1* MO, *ECAL-1* mRNA, (*ECAL-1* MO + *ECAL-1* mRNA) and (*ECAL-1* MO + MP  
524 mRNA), respectively. **(H)** Confocal stack micrographs of head vasculature injected with  
525 Quantum Dot at 55hpf, including embryos injected with control embryos, morphants and  
526 mutants, respectively. Leakage sites are indicated by white arrows. N=8, 10 and 13 for control  
527 MO, *ECAL-1* MO and *ECAL-1* mutant, respectively. Values are means  $\pm$  SEM. \* $p < 0.05$ ;  
528 \*\*\* $p < 0.001$ . Scale bar: 200 $\mu$ m (C); 100 $\mu$ m (H).

529 **Figure 2. *ECAL-1* determines pattern formation of cerebrovascular network.**

530 **(A)** Percentage of cranial hemorrhage in control embryos and *ECAL-1* morphants in different  
531 degree at 48hpf, 60hpf and 72hpf. N=353 and 339 for control MO and *ECAL-1* MO, respectively.  
532 **(B)** Confocal stack micrographs of embryos injected with control MO and *ECAL-1* MO. Dorsal  
533 view of hindbrain at 72hpf. **(C)** Quantification percentage of abnormal hindbrain CtAs of control  
534 embryos and *ECAL-1* morphants at 72hpf. N=9 and 9 for control MO and *ECAL-1* MO,  
535 respectively. Statistical analysis was conducted using unpaired Student's two-tailed *t*-test. **(D)**  
536 Confocal stack micrographs of Sibling, MP mutant and *ECAL-1* mutant. Dorsal view of  
537 hindbrain at 72hpf. Statistical analysis was conducted using one-way ANOVA *post hoc* Tukey  
538 test. **(E)** Percentage of abnormal CtAs in Sibling, MP mutant and *ECAL-1* mutants at 72hpf. The  
539 abnormal CtAs are indicated by red dotted line, and normal CtAs are highlighted by white dotted  
540 line. The white arrows indicate the right cerebrovascular patterning. N=13, 11 and 12 for Sibling,  
541 MP mutant and *ECAL-1* mutant, respectively. Values are means  $\pm$  SEM. \*\*\* $p < 0.001$ ; Scale  
542 bar: 50 $\mu$ m (B and D).

543 **Figure 3. *ECAL-1* is enriched in endothelial cells and neurons of brain.**

544 **(A)** Expression pattern of *ECAL-1*. (a-g) Whole mount *in situ* hybridization (WISH) in indicated  
545 embryos. (h-j) Frozen section for trunk and head. DA: Dorsal aorta, PCV: Posterior cardinal vein,  
546 N: notochord. White arrows indicate co-localization of *ECAL-1* and marker genes (*Flk1* or *HuC*).

547 Anterior is to the left except as noted. **(B)** Quantification of *ECAL-1* expression level in different  
548 developmental stages by Real-Time PCR. **(C)** Quantification of *ECAL-1* expression level at  
549 FACS-sorted vascular endothelial cells (GFP positive) and non-endothelial cells (GFP negative)  
550 using Tg(Kdrl:eGFP) transgenic embryos. Each group has about 100 embryos, and this assay  
551 was performed three times. Statistical analysis was conducted using unpaired Student's  
552 two-tailed *t*-test. **(D)** Double fluorescence *in situ* hybridization (DFISH) for *Flkl1* and *ECAL-1* in  
553 trunk and hindbrain. **(E)** Whole-mount and section double fluorescence *in situ* hybridization for  
554 *HuC* and *ECAL-1* in hindbrain. The embryos used in Values are means  $\pm$  SEM. \*\*\**p*<0.001.  
555 Scale bar: 100 $\mu$ m (a-g in A); 50 $\mu$ m (h-j in A); 50 $\mu$ m (D and top row in E). 10 $\mu$ m (bottom row in  
556 E).

557 **Figure 4. Connections between endothelial cells were disturbed in *ECAL-1* deficiency**  
558 **embryos.**

559 **(A)** Lateral view of head vasculature in Tg(*Fli1:negfp,Kdrl:mcherry<sup>Ras</sup>*) embryos injected with  
560 control MO and *ECAL-1* MO at 72hpf. **(B and C)** Statistics of endothelial cell number in PHBC  
561 (B) and CtAs (C) of control embryos and *ECAL-1* morphants at 72hpf. N=8 and 10 for control  
562 MO and *ECAL-1* MO, respectively. Statistical analysis was conducted using unpaired Student's  
563 two-tailed *t*-test. **(D)** Fluorescence *in situ* hybridization for *Pdgfrb* and immunofluorescence for  
564 GFP in control embryos, *ECAL-1* morphants and *ECAL-1* mutants. **(E)** Statistics of pericytes in  
565 hindbrain of control embryos, *ECAL-1* morphants. Statistical analysis was conducted using  
566 one-way ANOVA *post hoc* Tukey test. N=8 and 8, for control MO, *ECAL-1* MO, respectively. **(F)**  
567 Transmission electron microscopy (TEM) images showing the ultrastructural changes of brain  
568 vessels in control embryos and *ECAL-1* morphants. (a and b) The cross section of CtAs. (c and  
569 d)The areas outlined by red dashed frame in (a and b). (e and f) Schematic diagram of  
570 endothelial cell connection. L:Lumen; EC: Endothelial cell; Values are means  $\pm$  SEM.  
571 \*\*\**p*<0.001. Scale bar: 50 $\mu$ m (A); 50 $\mu$ m (D); 1 $\mu$ m (a and b in F).

572 **Figure 5. *Cldn5b* is a functional downstream effector of *ECAL-1* during cerebrovascular**  
573 **homeostasis maintenance.**

574 (A) Detection of *Cldn5b* and *Cdh5* mRNA expression level by whole mount in situ hybridization  
575 in control embryos and *ECAL-1* morphants at 30hpf. (B) Detection of *Cldn5* and *Cdh5* protein  
576 expression level by Western Blotting at 48hpf. Each group has more than 30 embryos, and this  
577 assay was performed three times. (C) Quantitative analysis of three times western blotting results.  
578 (D) Immunofluorescence for GFP and *Cldn5* in cross section of control embryos and *ECAL-1*  
579 morphants at 72hpf. (E) Bright field images of O-dianisidine staining embryos injected with  
580 control MO, *Cldn5a* MO or *Cldn5b* MO at 72 hpf. (F) Statistics of embryos with cranial  
581 hemorrhage, including control embryos, *Cldn5a* morphants and *Cldn5b* morphants at 72hpf.  
582 N=168, 108 and 153, for control MO, *Cldn5a* MO and *Cldn5b* MO, respectively. Statistical  
583 analysis was conducted using one-way ANOVA *post hoc* Tukey test. (G) Confocal stack  
584 micrographs of embryos injected with control MO and *Cldn5b* MO (0.5pmol and 1pmol). Dorsal  
585 view of hindbrain at 72hpf. The abnormal CtAs are indicated by red dotted line, and normal  
586 CtAs are highlighted by white dotted line. The white arrows indicate the right cerebrovascular  
587 patterning. (H) Confocal stack micrographs of head vasculature injected with Quantum Dot,  
588 including control embryos, *Cldn5b* morphants (0.5 pmol and 1 pmol). (I) Percentage of cranial  
589 hemorrhage in embryos injected with control MO, *ECAL-1* MO, (*ECAL-1* MO and *Cdh5*  
590 mRNA), or (*ECAL-1* MO and *Cldn5b* mRNA) in different degree. The cranial edema is indicated  
591 by asterisk. N=121, 155, 140 and 152, for control MO, *ECAL-1* MO, (*ECAL-1* MO + *Cdh5*  
592 mRNA) and (*ECAL-1* MO + *Cldn5b* mRNA), respectively. Values are means  $\pm$  SEM. \* $p < 0.05$ ;  
593 \*\*\* $p < 0.001$ . Scale bar: 100 $\mu$ m (A); 25 $\mu$ m (D); 200 $\mu$ m (E); 50 $\mu$ m (G); 100 $\mu$ m (H).

594 **Figure 6. *ECAL-1* promotes *Cldn5b* by acting as a sponge of miR-23a.**

595 (A) Fluorescence *in situ* hybridization (FISH) for *ECAL-1* and co-localization with DAPI. (B)  
596 Quantification of *ECAL-1*, *Actin* and *U6* expression level in nuclear and cytoplasmic fractions of  
597 30hpf embryos. Each group has more than 30 embryos, and this experiment was conducted three  
598 times. Statistical analysis was conducted using unpaired Student's two-tailed *t*-test. (C) Diagram  
599 of miR-23a target sites in *ECAL-1* and *Cldn5b*. (D) Diagram of the 3'UTR of the In vivo reporter  
600 assay used. (E) Fluorescence *in situ* hybridization (FISH) for miR-23a and immunofluorescence

601 for GFP in hindbrain. **(F)** In vivo reporter assay of the GFP mRNA bearing wild-type *Cldn5b*  
602 3'UTR or mutated 3'UTR co-injected with control mimic, miR-23a mimic at 30 hpf. dsRed  
603 mRNA serves as an internal control. **(G)** Quantification of fluorescence density in areas outlined  
604 by white dash frame in G. The value of density is calculated by ImageJ. Each group has about 30  
605 embryos, and we only observed the embryos with normal gross morphology, and analyzed  
606 representative embryos. This assay was performed three times. Statistical analysis was conducted  
607 using unpaired Student's two-tailed *t*-test. Values are means  $\pm$  SEM. \*\**p*<0.01; \*\*\**p*<0.001.  
608 Scale bar: 10 $\mu$ m (A); 50 $\mu$ m (E); 500 $\mu$ m (F).

609 **Figure 7. Functional model of *ECAL-1* in cerebrovascular pattern formation.**

610 Our work revealed that *ECAL-1* regulated *Cldn5b* by acting as a sponge of miR-23a during  
611 maintaining cerebrovascular pattern. When knockdown of *ECAL-1*, excessive miR-23a inhibit  
612 the translation of tight junction protein *Cldn5b*, resulting in anomalous connection between ECs  
613 and abnormal cerebrovascular pattern, even angiorrhhexis and blood cells leaked out of  
614 vasculature.



615 **Figures**  
616 **Figure 1**

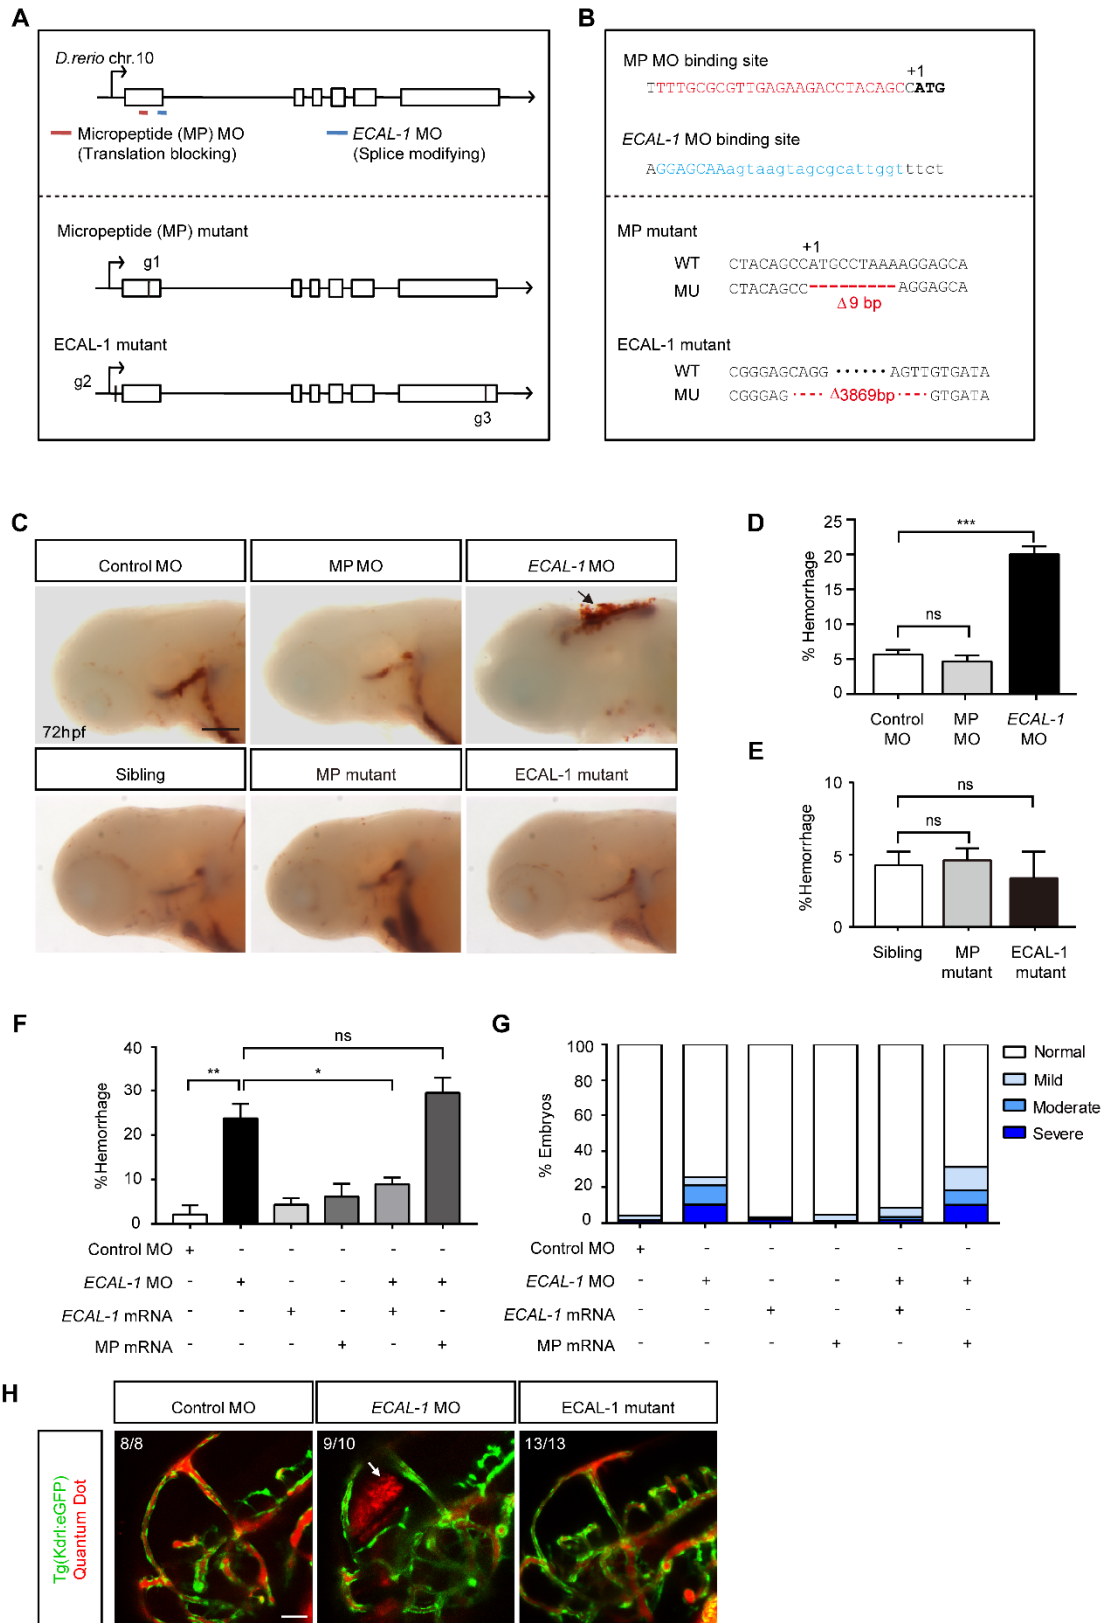

617

618

**Figure 2**

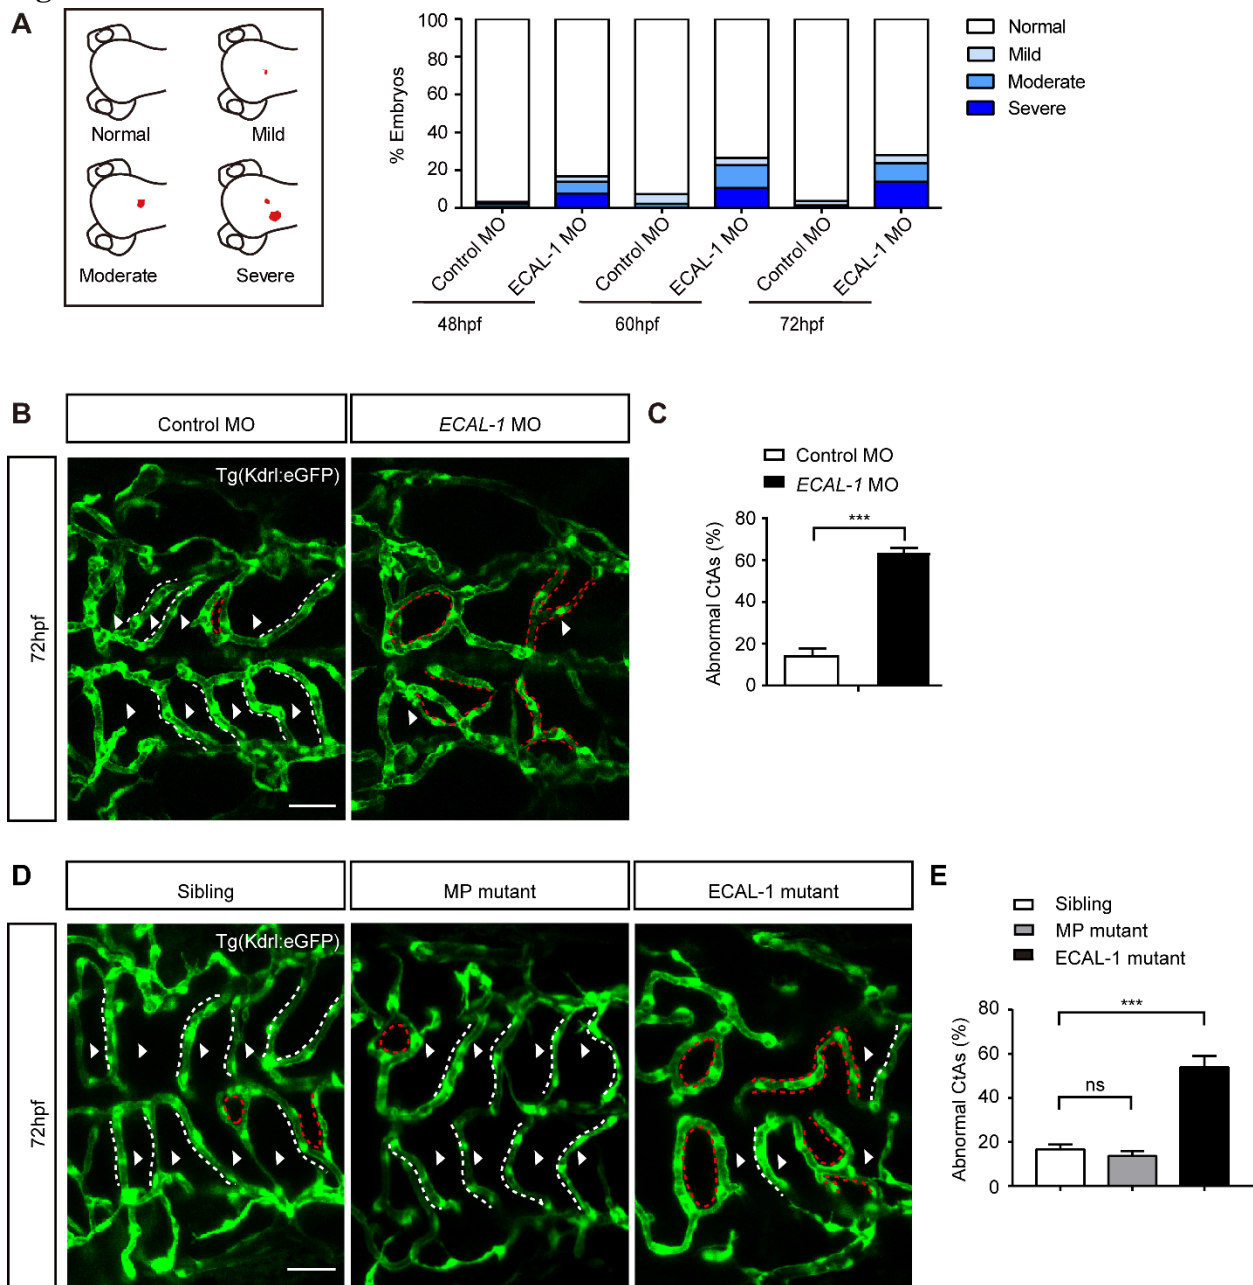

619

620 **Figure 3**

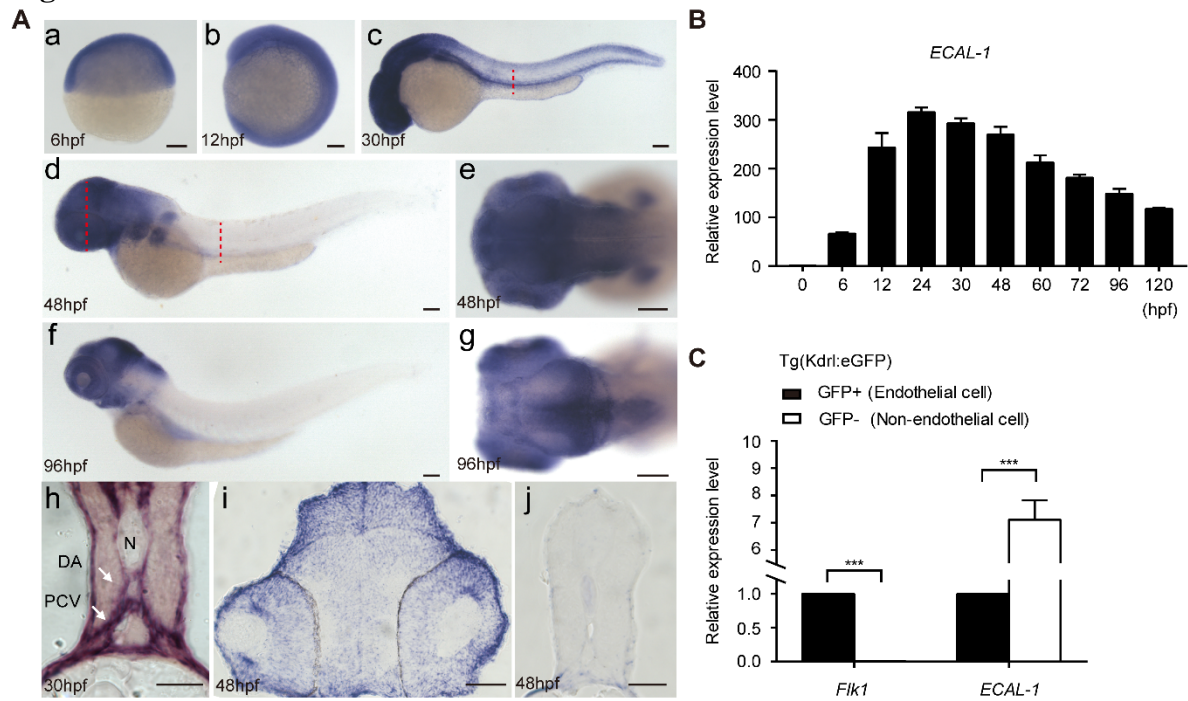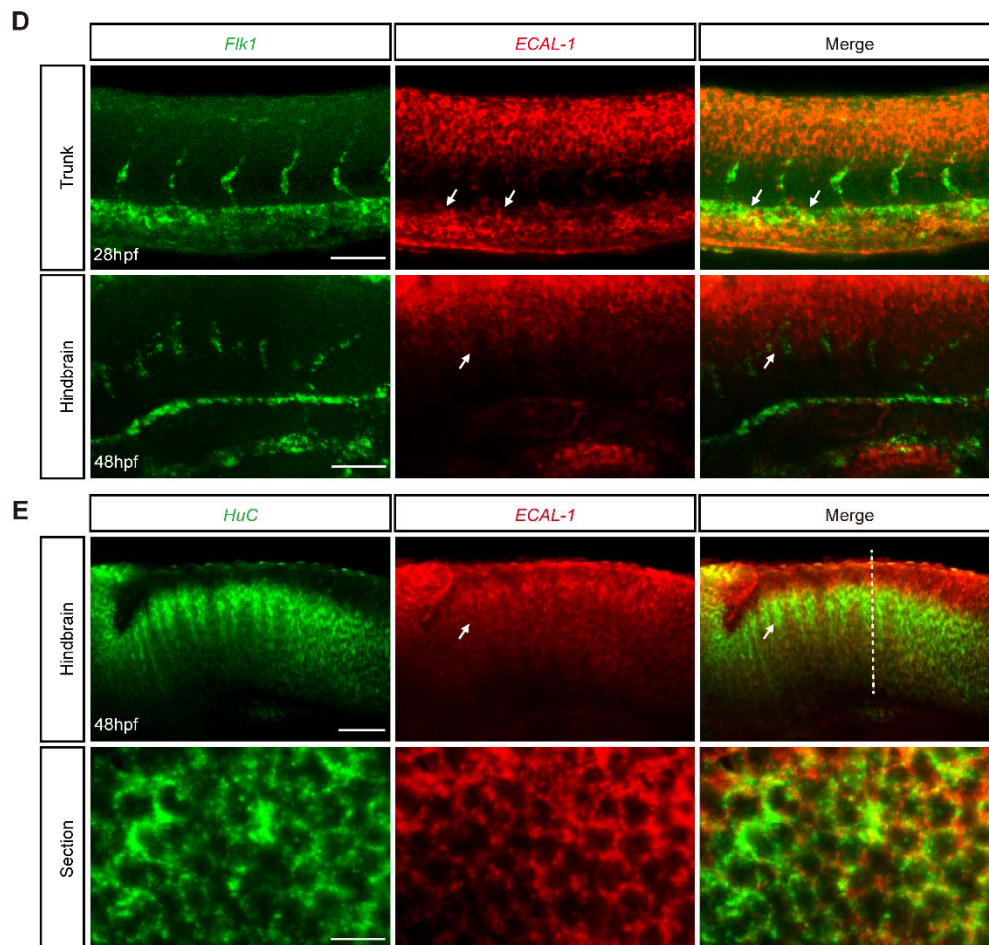

621



622 **Figure 4**

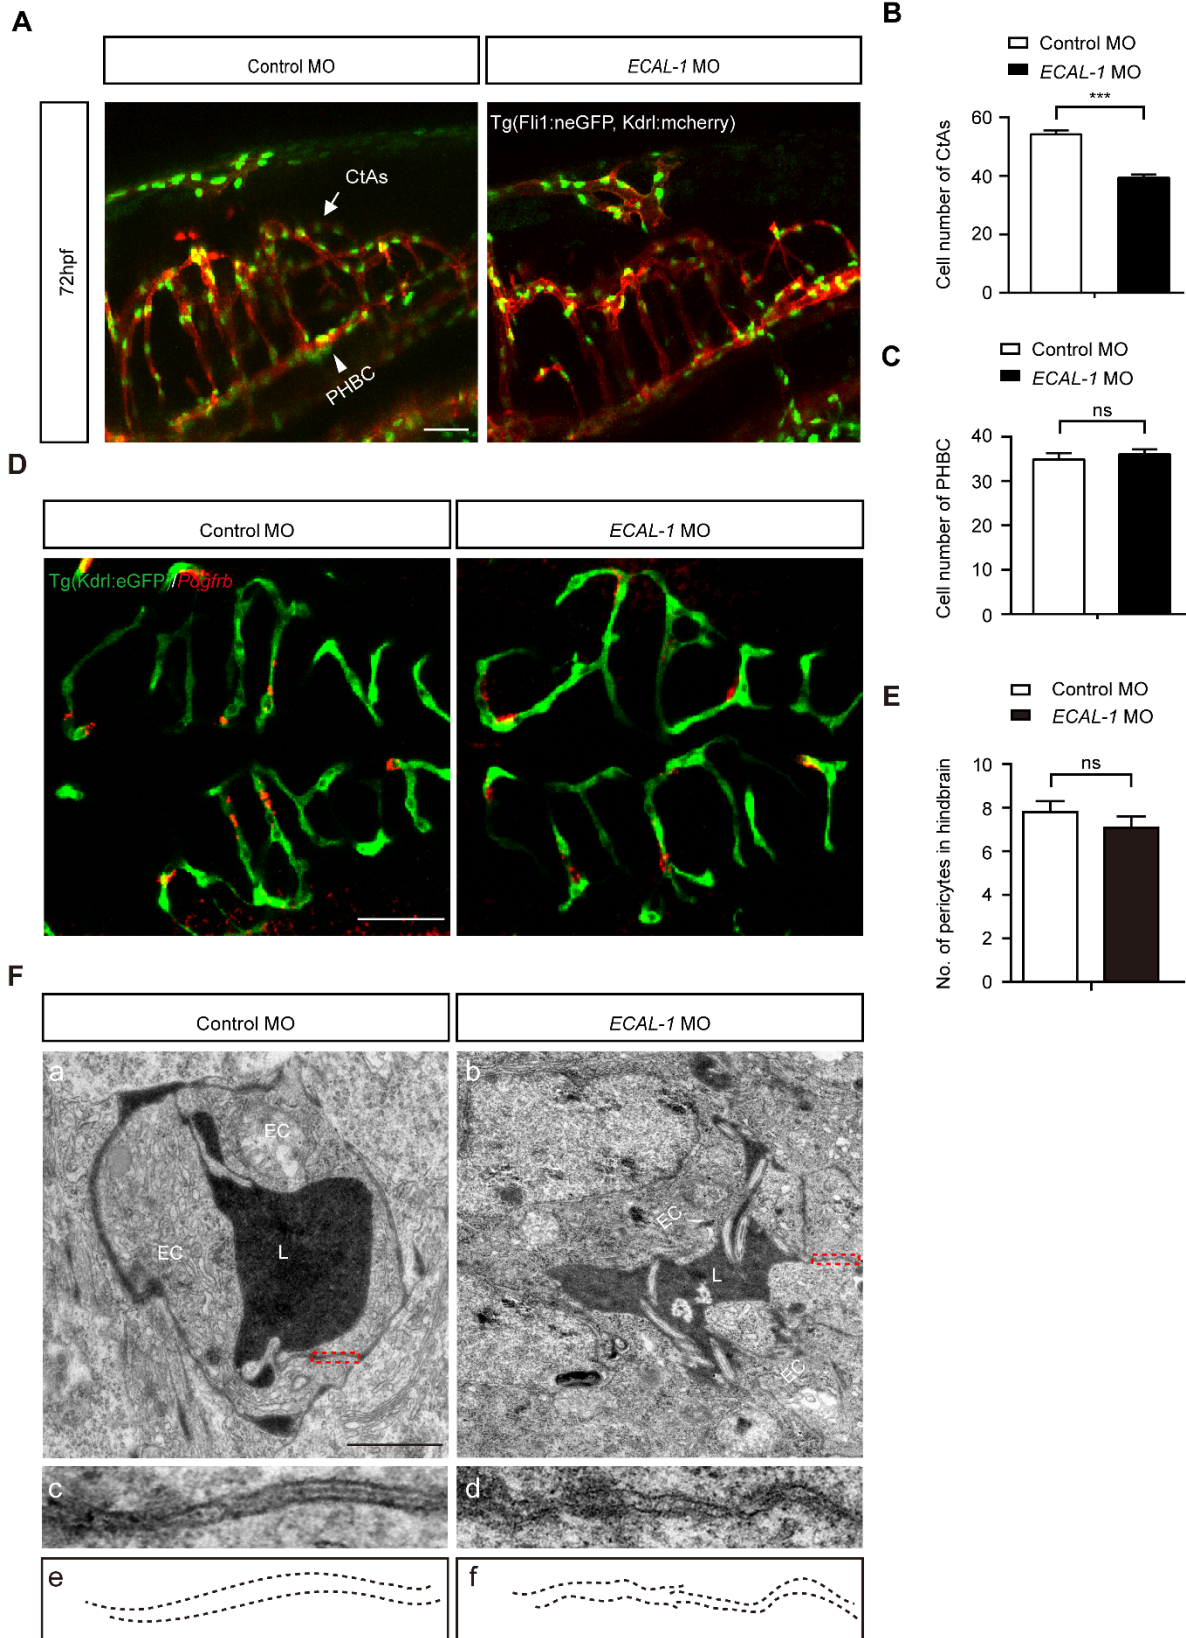

623

624 **Figure 5**

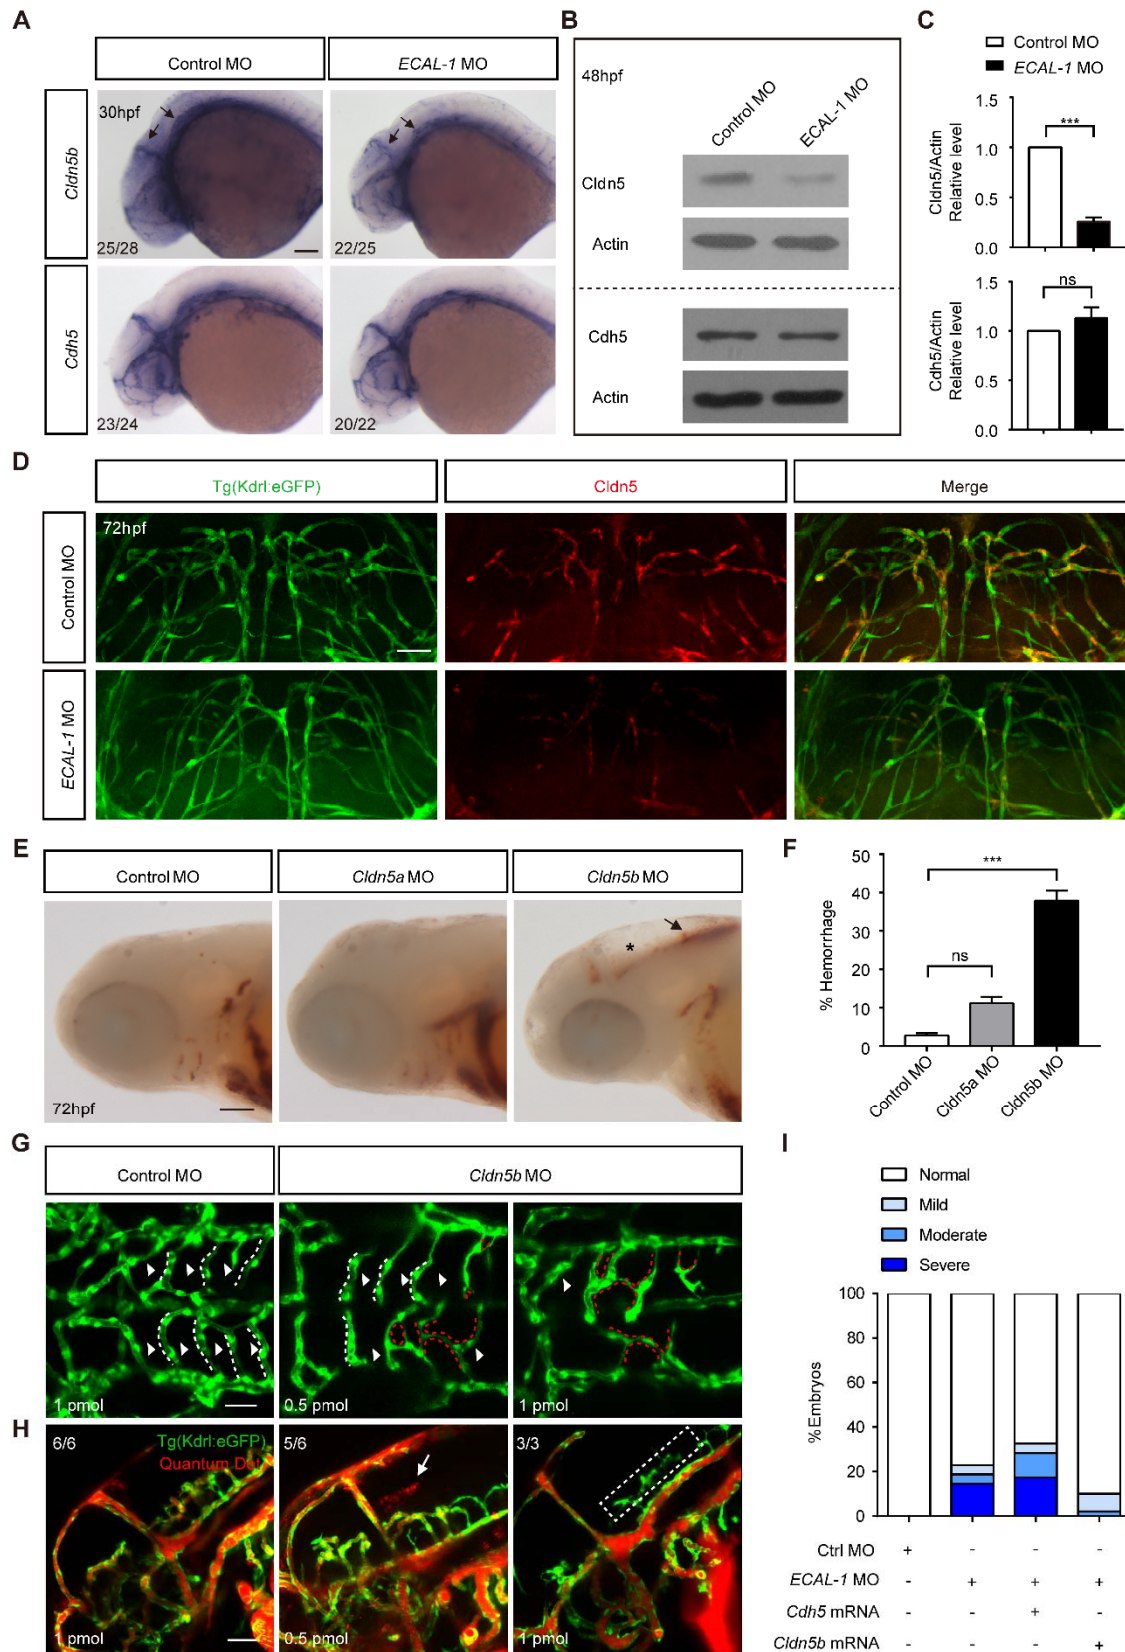

625

626 **Figure 6**

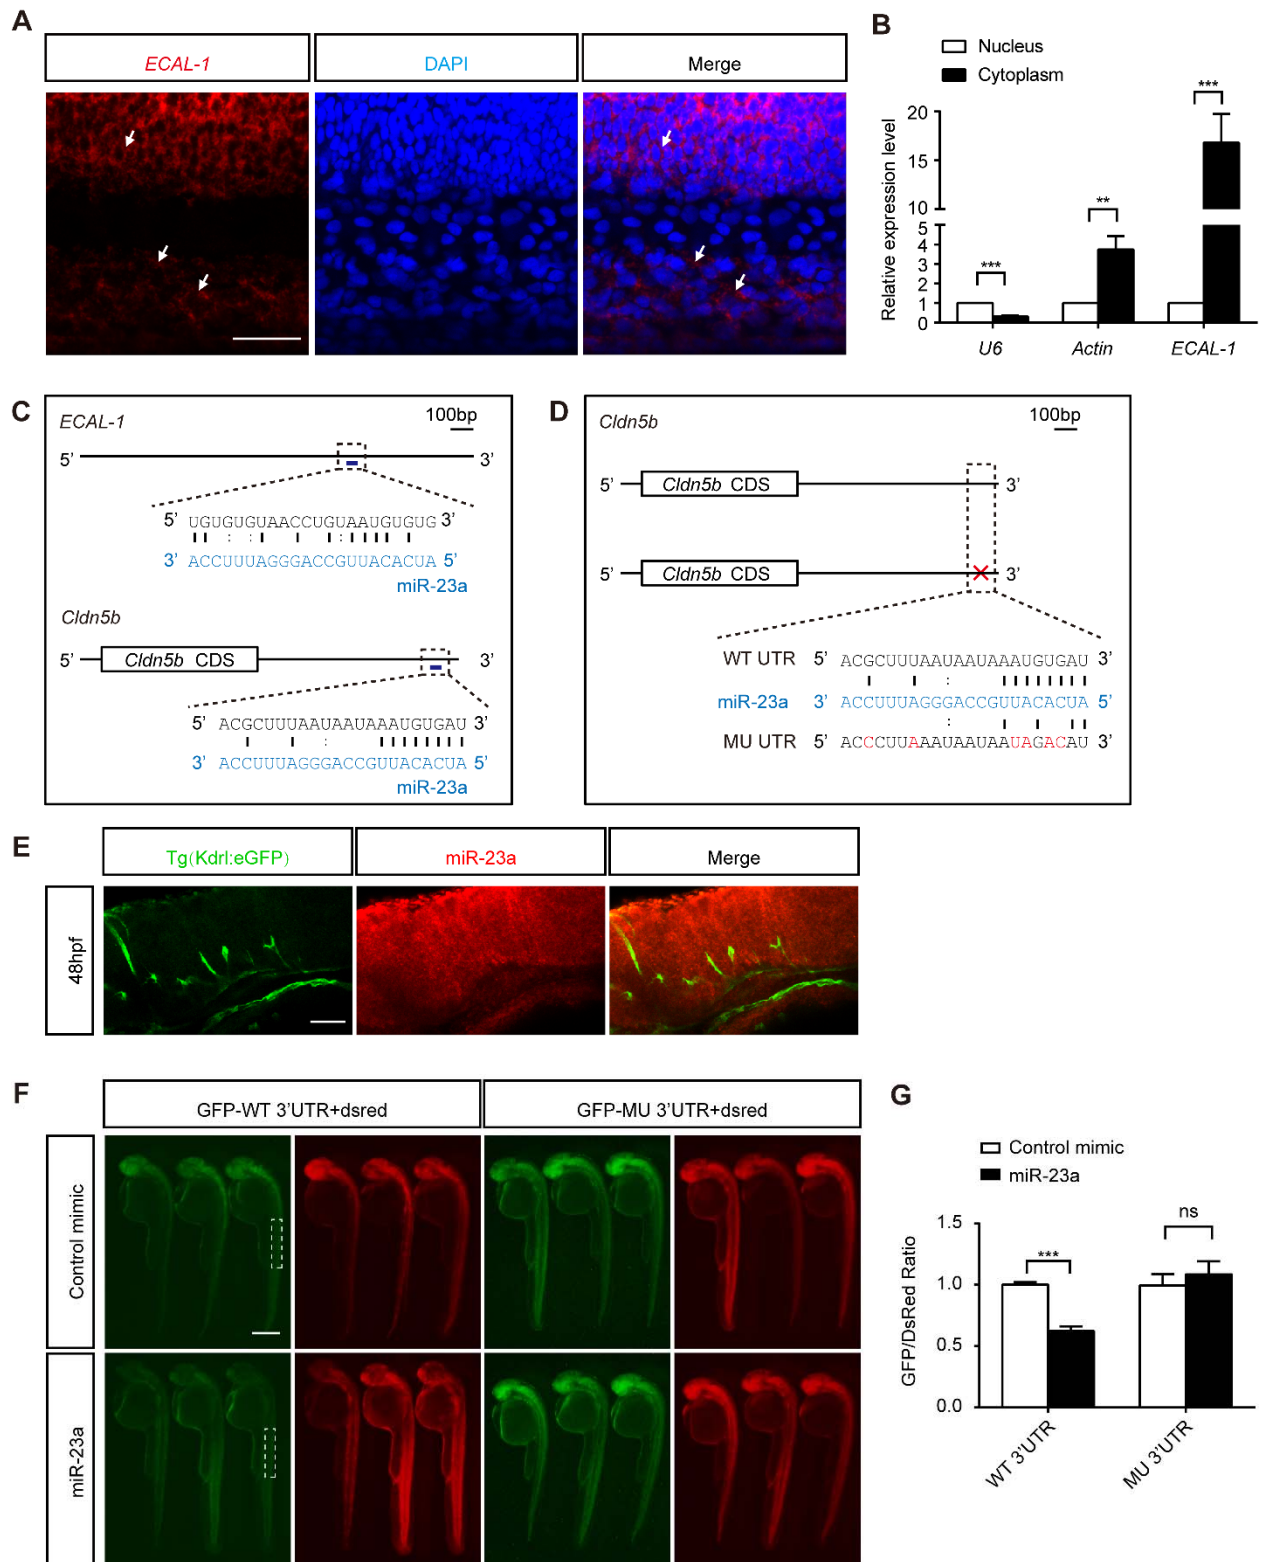

627

628

629 **Figure7**

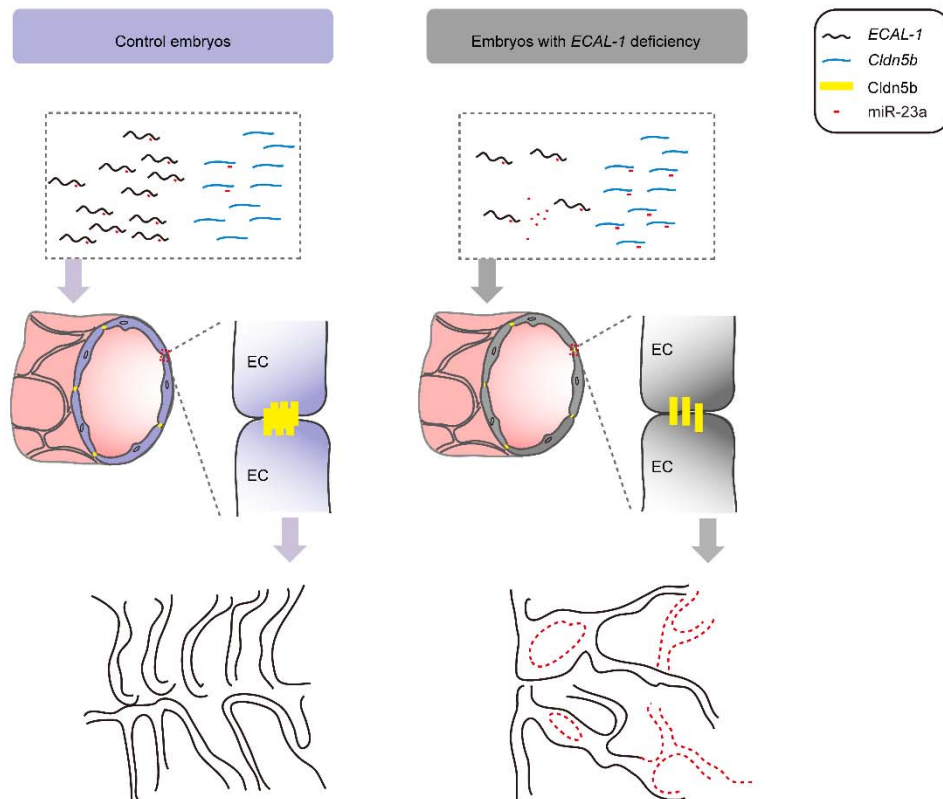

Source: https://www.biorxiv.org/content/biorxiv/early/2020/01/31/2020.01.30.926279.full.pdf
